# Supplementary material for: G-Quadruplex Forming DNA Sequence Context Is Enriched around Points of Somatic Mutations in a Subset of Multiple Myeloma Patients
Source: MDPI journal article supplement (doi:10.3390/ijms25105269), 2024-05-12
Supplement: s1 [file s1]

## Supplementary Information

### Supplementary figures

**Figure S1. Heatmap of the influence of somatic mutations on G4 prediction.** Structures predicted in the region were classified as described in the Materials and Methods section, using sequence information from the reference genome and data from germinal mutation calling. Somatic mutations altered the predicted structure of the region in 33 cases.

**Figure S2. Distribution of genetic variant consequences associated with G4 prediction changes due to somatic Mutations.** The pie chart categorizes and visualizes the frequency of genetic variant consequences in cases where the presence of somatic mutations led to changes in G4 prediction. Changes in G4 were predicted in the 3' and 5' untranslated regions (UTRs) of genes, as well as in introns, exons and intergenic regions. Each pie segment proportionally represents the count of each variant type.

**Figure S3. Germinal variants with high or moderate impact found in the genes encoding DNA repair factors found in patients.** Variants with high or moderate significance in the genes affecting various DNA repair processes were plotted for each of the 11 patients. CoMut was used for SNPs visualization [1].

1. Crowdis, J.; He, M.X.; Reardon, B.; van Allen, E.M. CoMut: Visualizing Integrated Molecular Information with Comutation Plots. *Bioinformatics* **2020**, *36*, 4348–4349. doi:10.1093/BIOINFORMATICS/BTAA554.

## Supplementary tables

Table S1. Common rsID found in patients S12, P23, P37, which were absent in other patients.

| rsID                           | GnomAD_AF   | Gene            | Gene function                                     | Consequence                                        |
|--------------------------------|-------------|-----------------|---------------------------------------------------|----------------------------------------------------|
| rs11250255<br>(minor allele T) | 0.04507 (*) | <i>WDR37</i>    | WD repeat domain 37                               | splice_polypyrimidine_tract_variant&intron_variant |
| rs59626794                     | 0.08812 (*) | <i>TSKS</i>     | testis specific serine kinase substrate           | inframe_deletion (repeats)                         |
| rs10999212                     | 0.2211      | <i>NPFFR1</i>   | neuropeptide FF receptor 1                        | synonymous_variant                                 |
| rs12130207                     | 0.1829      | <i>LRRC8B</i>   | leucine rich repeat containing 8 VRAC subunit B   | synonymous_variant                                 |
| rs2297595                      | 0.08532 (*) | <i>DPYD</i>     | dihydropyrimidine dehydrogenase                   | missense_variant                                   |
| rs76007555                     | 0.05492 (*) | <i>TTC23</i>    | tetratricopeptide repeat domain 23                | synonymous_variant                                 |
| rs10860577                     | 0.1354      | <i>SCYL2</i>    | SCY1 like pseudokinase 2                          | synonymous_variant                                 |
| rs17855473                     | 0.1656      | <i>AGFG2</i>    | ArfGAP with FG repeats 2                          | missense_variant                                   |
| rs17803441                     | 0.04905 (*) | <i>SLC25A32</i> | solute carrier family 25 member 32                | missense_variant                                   |
| rs3098238                      | 0.0503 (*)  | <i>DCAF13</i>   | DDB1 and CUL4 associated factor 13                | synonymous_variant                                 |
| rs79383654                     | 0.06025 (*) | <i>LARP7</i>    | La ribonucleoprotein 7, transcriptional regulator | missense_variant                                   |
| rs2076165                      | 0.1413      | <i>TENM1</i>    | teneurin transmembrane protein 1                  | synonymous_variant                                 |
| rs3781413                      | 0.1421      | <i>CTBP2</i>    | C-terminal binding protein 2                      | synonymous_variant                                 |
| rs372118432                    | 0.1 (AF)    | <i>CTBP2</i>    |                                                   | inframe_insertion                                  |
| rs532090538                    | 0.0204 (*)  | <i>PCDH12</i>   | protocadherin 12                                  | inframe_insertion                                  |

(\*) – denote rsID with allele frequency below 0.1 that were discussed in the study

Table S2. Molecular function of genes carrying the rsID from Table S1 with AF < 0.1. The information was obtained from GeneCards database (genecards.org), assessed on December 1, 2023

| Gene            | Function                                                                                                                                                                                                                                                                                                                                                                                                                                                                                                                        |
|-----------------|---------------------------------------------------------------------------------------------------------------------------------------------------------------------------------------------------------------------------------------------------------------------------------------------------------------------------------------------------------------------------------------------------------------------------------------------------------------------------------------------------------------------------------|
| <i>WDR37</i>    | <i>WDR37</i> (WD Repeat Domain 37) is a Protein Coding gene. Diseases associated with <i>WDR37</i> include Neurooculocardiogenitourinary Syndrome and Coloboma Of Macula.                                                                                                                                                                                                                                                                                                                                                       |
| <i>TSKS</i>     | This gene may play a role in testicular physiology, spermatogenesis or spermiogenesis. Expression of the encoded protein is highest in the testis and downregulated in testicular cancer. Associated with Testicular Cancer.                                                                                                                                                                                                                                                                                                    |
| <i>DPYD</i>     | The protein encoded by this gene is a pyrimidine catabolic enzyme and the initial and rate-limiting factor in the pathway of uracil and thymidine catabolism. Mutations in this gene result in dihydropyrimidine dehydrogenase deficiency, an error in pyrimidine metabolism associated with thymine-uraciluria and an increased risk of toxicity in cancer patients receiving 5-fluorouracil chemotherapy. Diseases associated with <i>DPYD</i> include Dihydropyrimidine Dehydrogenase Deficiency and Bunion.                 |
| <i>TTC23</i>    | <i>TTC23</i> (Tetratricopeptide Repeat Domain 23) is a Protein Coding gene. Predicted to be involved in positive regulation of smoothened signaling pathway. Diseases associated with <i>TTC23</i> include Chromosome 15Q26-Qter Deletion Syndrome and Kbg Syndrome.                                                                                                                                                                                                                                                            |
| <i>SLC25A32</i> | This gene encodes a member of the P(I/L)W subfamily of mitochondrial carrier family transport proteins. The encoded protein transports folate across the inner mitochondrial membrane. <i>SLC25A32</i> (Solute Carrier Family 25 Member 32) is a Protein Coding gene. Diseases associated with <i>SLC25A32</i> include Exercise Intolerance, Riboflavin-Responsive and Multiple Acyl-CoA Dehydrogenase Deficiency, Mild Type. Among its related pathways are Metabolism of water-soluble vitamins and cofactors and Metabolism. |
| <i>DCAF13</i>   | <i>DCAF13</i> (DDB1 And CUL4 Associated Factor 13) is a Protein Coding gene. Enables estrogen receptor binding activity. Predicted to be involved in maturation of SSU-rRNA from tricistronic rRNA transcript (SSU-rRNA,                                                                                                                                                                                                                                                                                                        |

|              |                                                                                                                                                                                                                                                                                                                                                                                                                                                                                                                                                                                                                     |
|--------------|---------------------------------------------------------------------------------------------------------------------------------------------------------------------------------------------------------------------------------------------------------------------------------------------------------------------------------------------------------------------------------------------------------------------------------------------------------------------------------------------------------------------------------------------------------------------------------------------------------------------|
|              | 5.8S rRNA, LSU-rRNA). Located in several cellular components, including centrosome; cytosol; and nuclear lumen. Part of Cul4-RING E3 ubiquitin ligase complex. Part of the small subunit (SSU) processome, first precursor of the small eukaryotic ribosomal subunit.                                                                                                                                                                                                                                                                                                                                               |
| <i>LARP7</i> | <i>LARP7</i> (La Ribonucleoprotein 7, Transcriptional Regulator) is a Protein Coding gene. Diseases associated with <i>LARP7</i> include Alazami Syndrome and Alazami-Yuan Syndrome. This gene encodes a protein which is found in the 7SK snRNP (small nuclear ribonucleoprotein). This snRNP complex inhibits a cyclin-dependent kinase, positive transcription elongation factor b, which is required for paused RNA polymerase II at a promoter to begin transcription elongation. RNA-binding protein that specifically binds distinct small nuclear RNA (snRNAs) and regulates their processing and function. |

Table S3. SNPs affecting *DDX5* gene that are absent in the group without G4 strong enrichment.

| Patient | <i>DDX5</i> polymorphisms detected | Position       | Consequence                                                       | GnomAD AF |
|---------|------------------------------------|----------------|-------------------------------------------------------------------|-----------|
| P23     | rs62073204                         | chr17:64501194 | (G->C) intron variant<br>MIR5047: 500B Downstream Variant         | 0.006     |
| P37     | rs1427463                          | chr17:64496464 | <i>DDX5</i> downstream variant<br><i>POLG2</i> : Missense Variant | 0.29      |
|         | rs2075552                          | chr17:64504635 | C->T intron variant                                               | 0.14      |
|         | rs16947825                         | chr17:64505738 | C-G intron variant                                                | 0.13      |
|         | rs2075551                          | chr17:64505810 | C->G intron variant                                               | 0.13      |
|         | rs2075550                          | chr17:64505849 | A->G intron variant                                               | 0.28      |
|         | rs2075549                          | chr17:64505893 | C->T intron variant                                               | 0.05      |
|         | rs117604948                        | chr17:64506696 | G->A upstream variant                                             | 0.05      |
| S12     | rs16947825                         | chr17:64505738 | (C->G) intron variant                                             | 0.13      |
|         | rs2075551                          | chr17:64505810 | (C->G) intron (1) variant                                         | 0.12      |
